# Supplementary material for: Connecting lysosomes and mitochondria – a novel role for lipid metabolism in cancer cell death
Source: PubMed Central journal article supplement (PMC6664539; doi:10.1186/s12964-019-0399-2), 2019-07-29

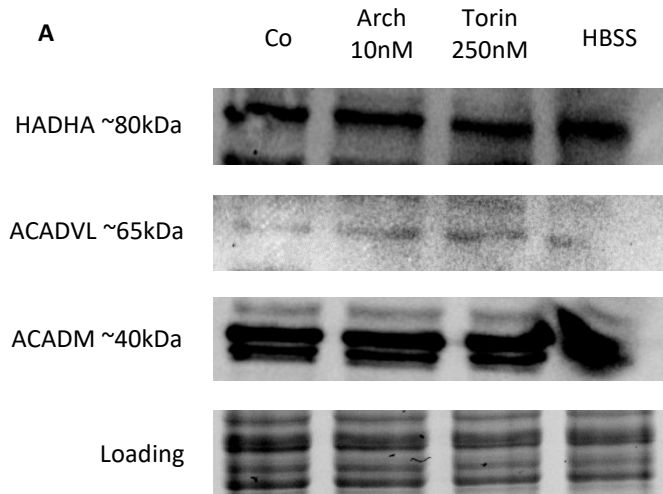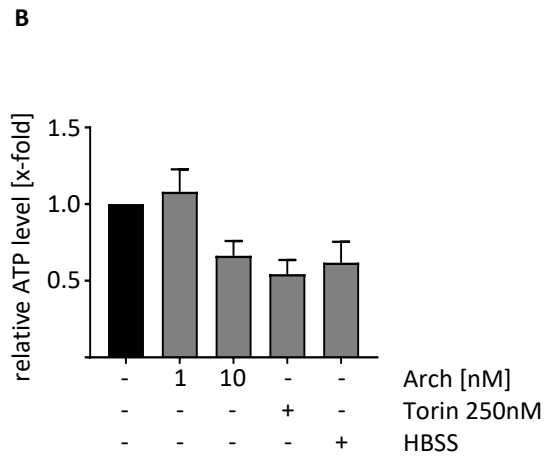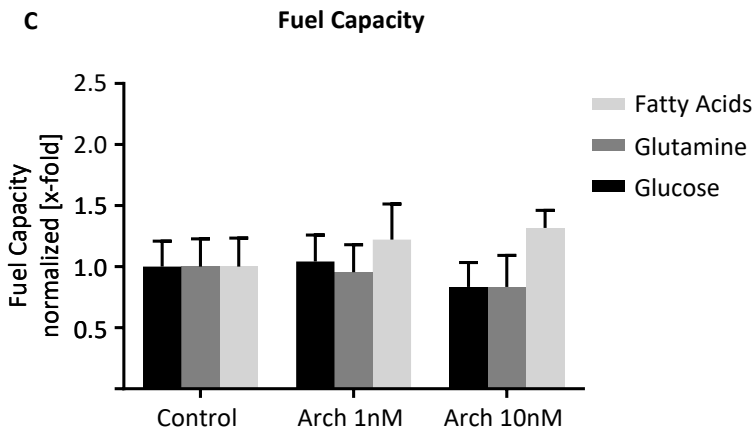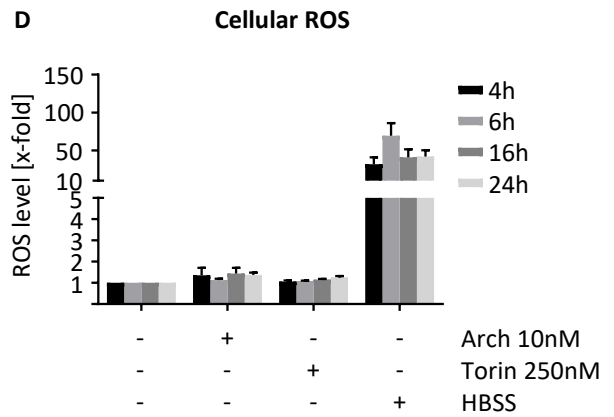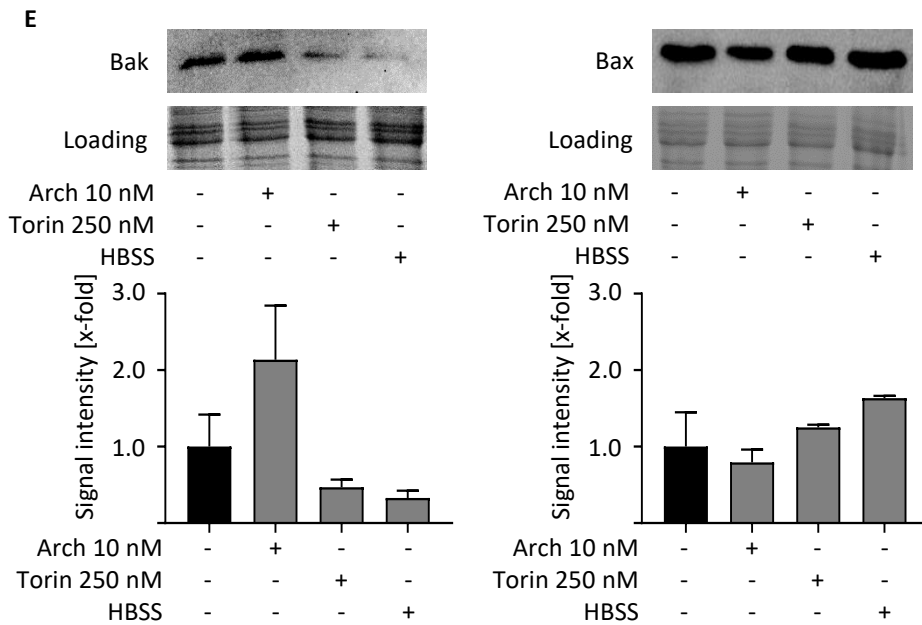

Supplement: 12964_2019_399_MOESM4_ESM.pdf [file 12964_2019_399_MOESM4_ESM.pdf]
